# Supplementary material for: Worsening urban ozone pollution in China from 2013 to 2017 – Part 1: The complex and varying roles of meteorology
Source: Copernicus journal article supplement (doi:10.5194/acp-2019-1120), 2020-01-09
Supplement: Supplementary file 1 [file acp-2019-1120-supplement.pdf]

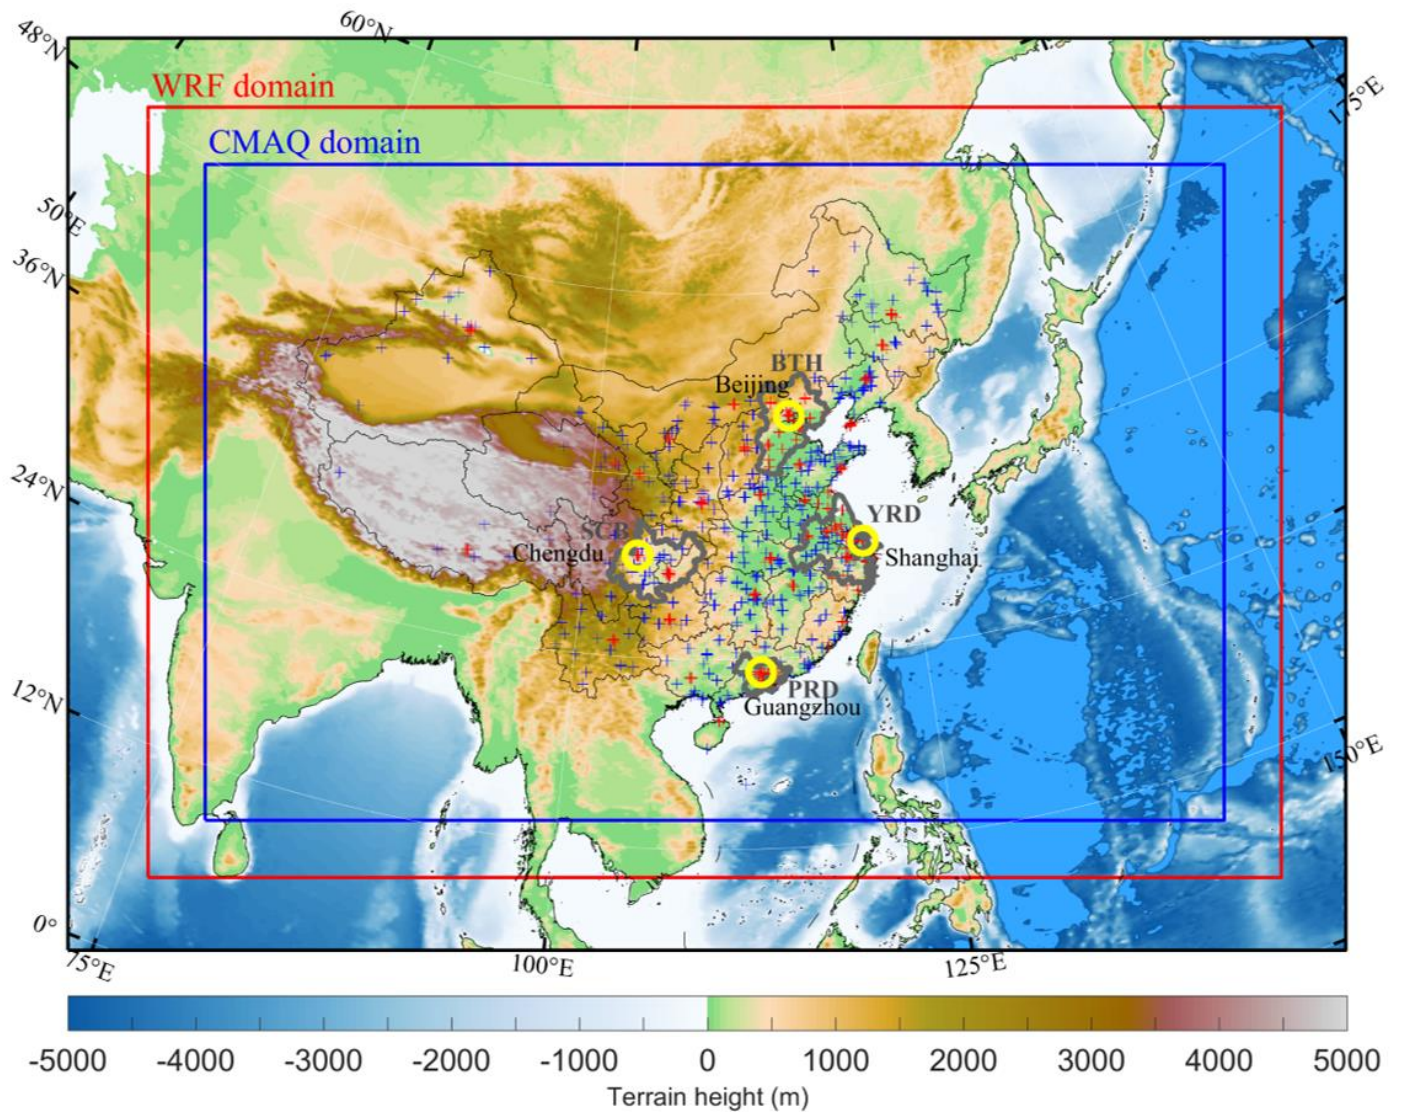

Figure S1 Model domains for the WRF (Red box) and CMAQ (Blue box) model. The red cross “+” represents the locations of environmental monitoring stations in 73 cities since 2013. The blue cross “+” represents the locations of environmental monitoring stations in other cities. The yellow circle denotes the locations of four major cities, Beijing, Shanghai, Guangzhou and Chengdu. The regions with bold gray boundary are the Beijing-Tianjin-Hebei (BTH), Yangtze River Delta (YRD), Pearl River Delta (PRD), and Sichuan Basin (SCB) regions.

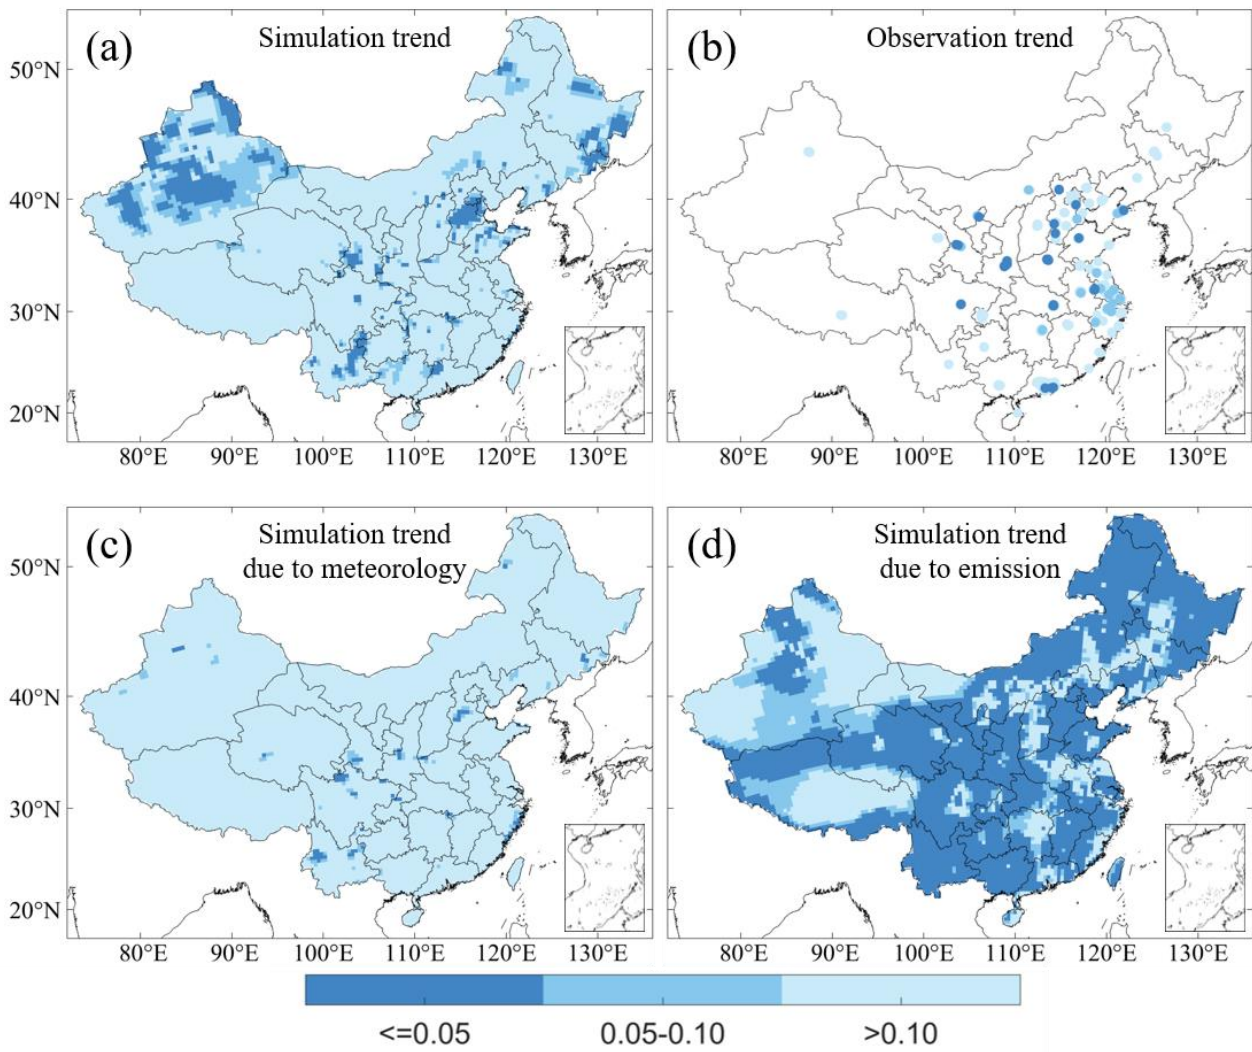

Figure S2 p values of regression for the rates of changes in the simulated (a) and observed (b) summer surface MDA8 O<sub>3</sub> concentrations, and those in the simulated concentrations due to variations in meteorological conditions (c) and anthropogenic emissions (d) across China from 2013 to 2017.

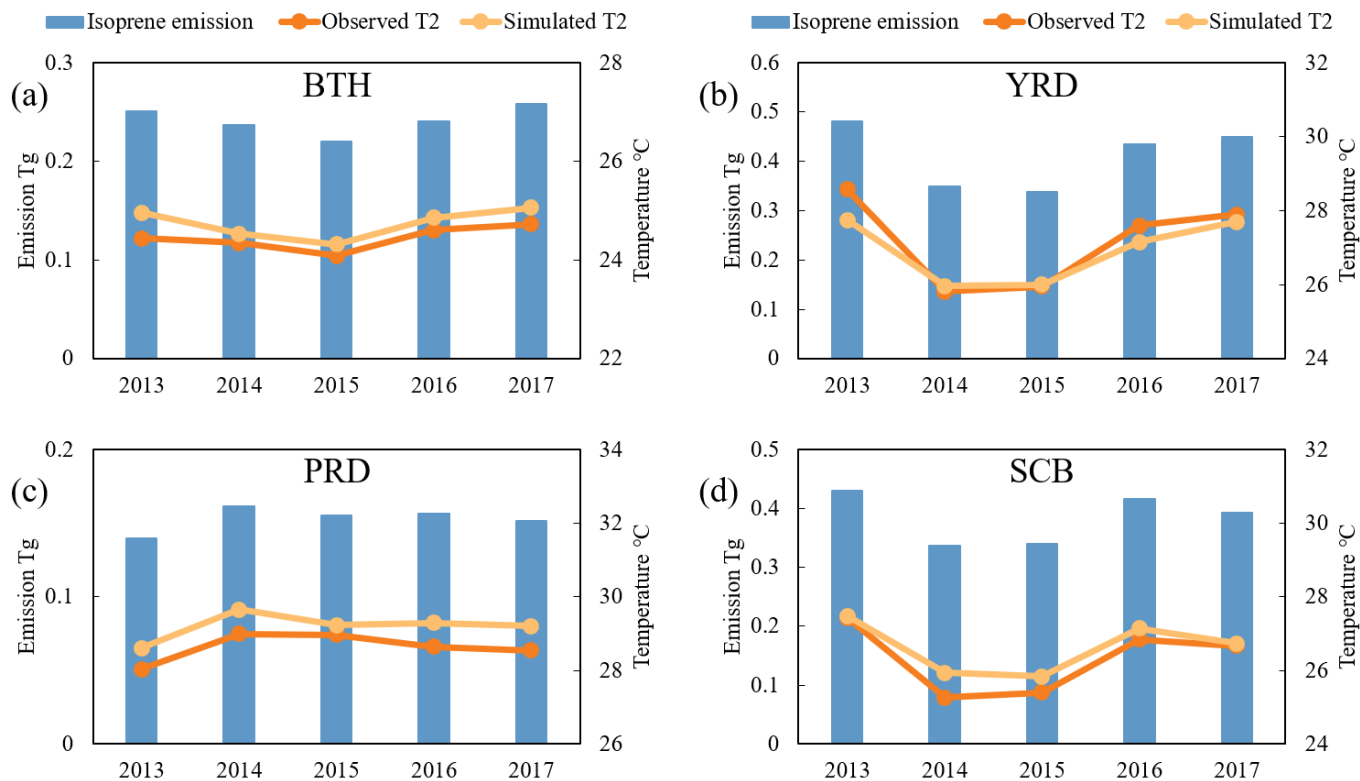

Figure S3 Variations in summer biogenic isoprene emissions, and observed and simulated temperature at a height of 2 m in the (a) Beijing-Tianjin-Hebei (BTH), (b) Yangtze River Delta (YRD), (c) Pearl River Delta (PRD), and (d) Sichuan Basin (SCB) regions from 2013 to 2017. The temperatures are averaged for the weather stations of the corresponding regions.

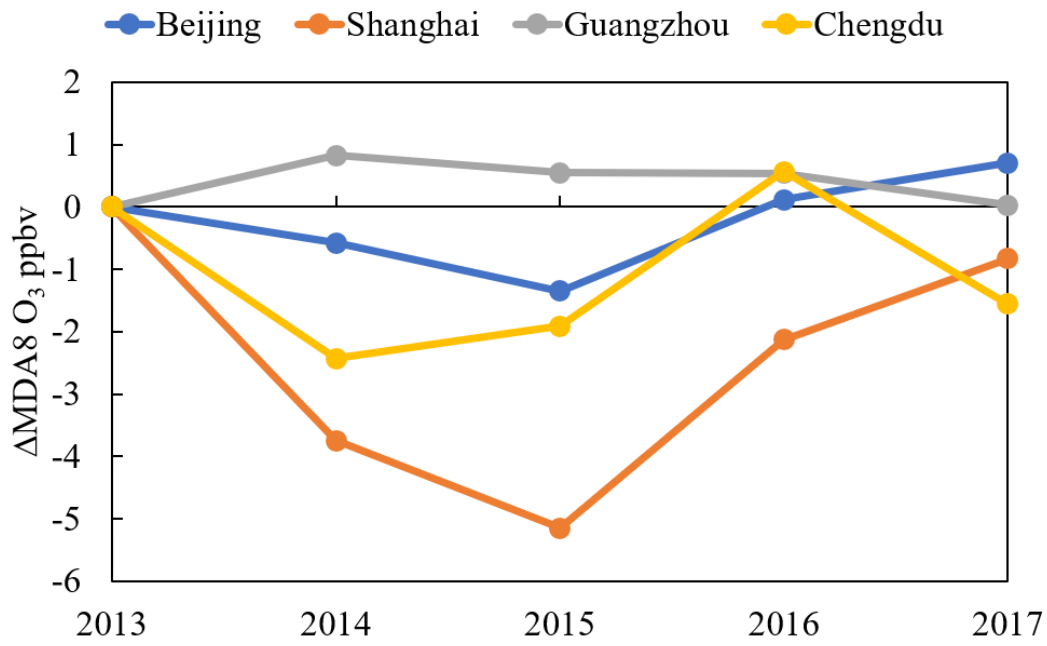

Figure S4 Changes in the simulated summer surface MDA8 O<sub>3</sub> due to variations in biogenic emissions in Beijing, Shanghai, Guangzhou, and Chengdu from 2013 to 2017 relative to 2013.



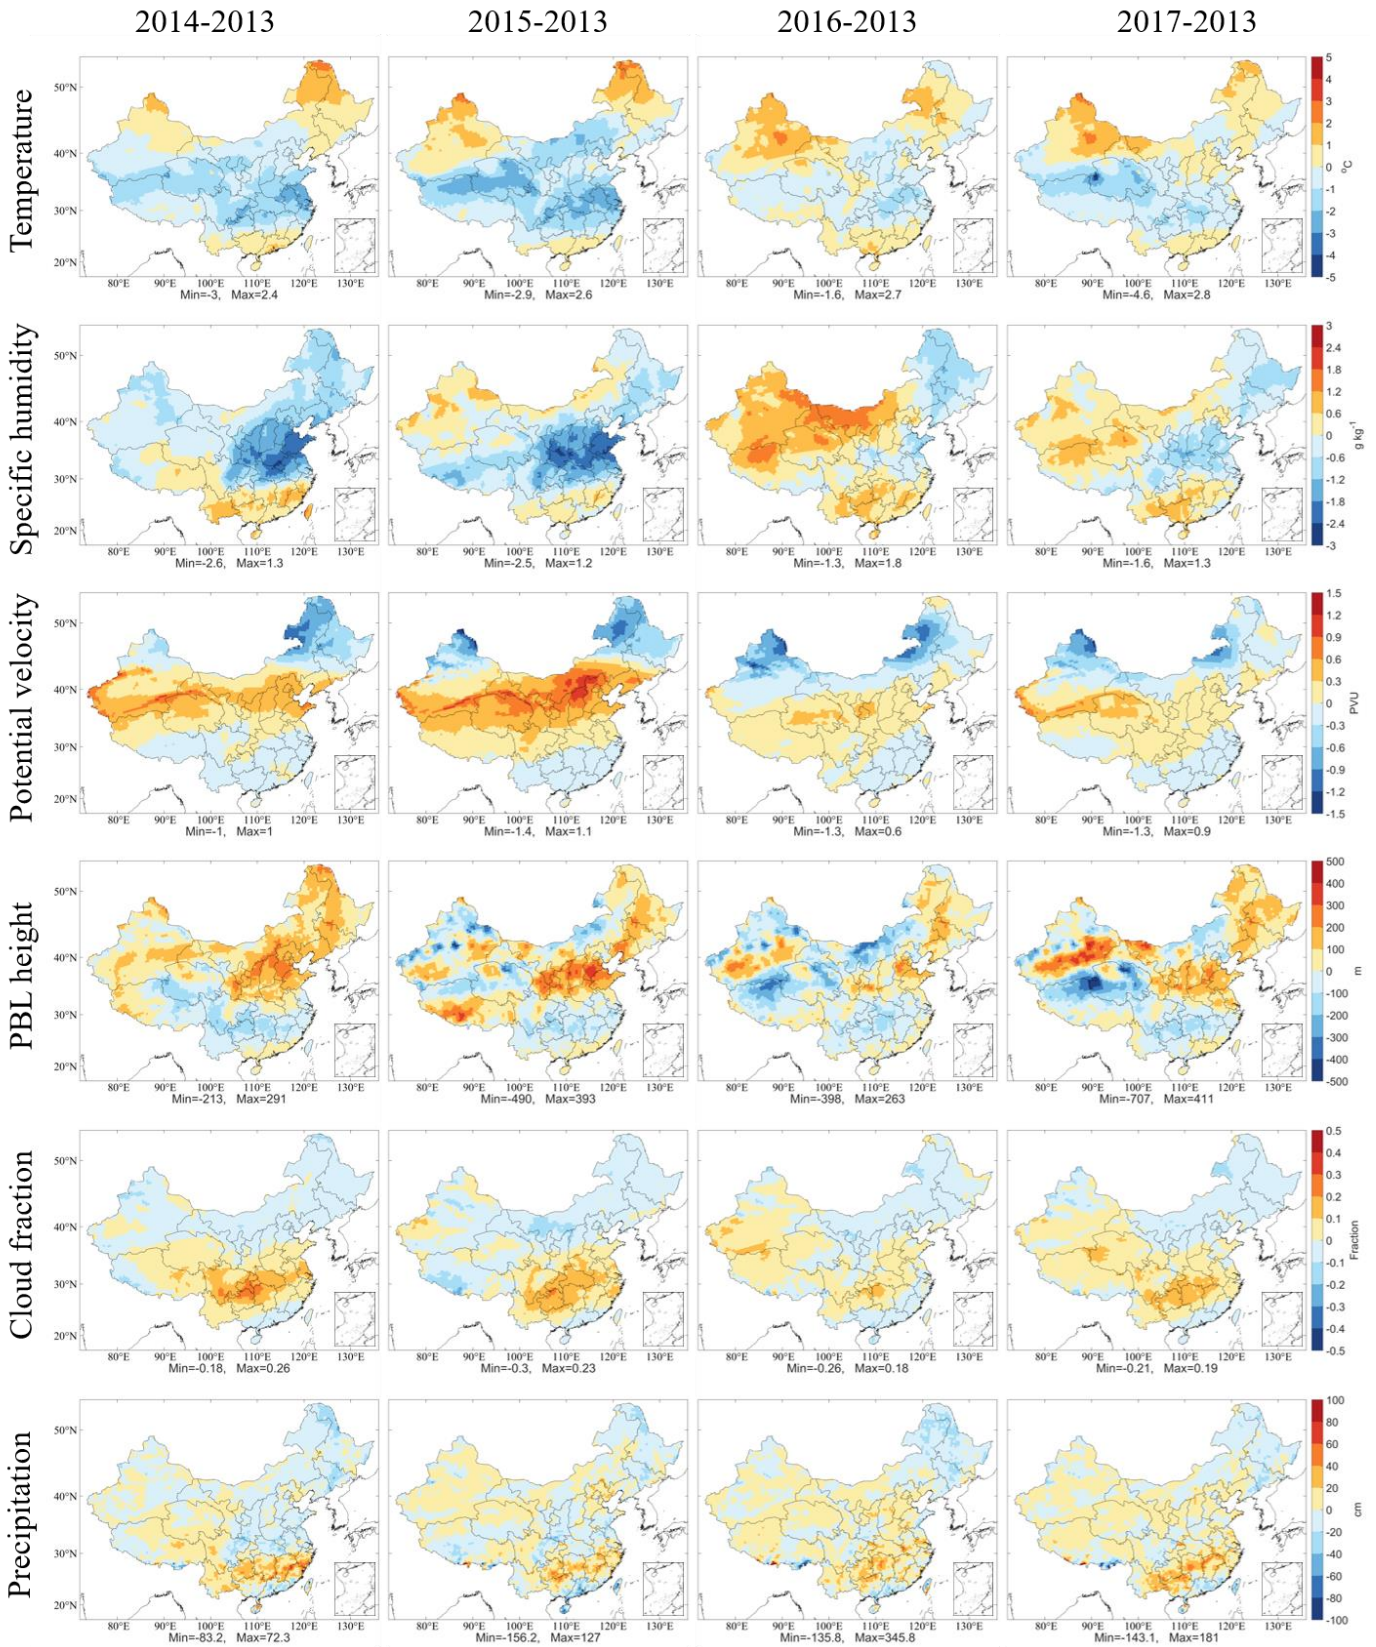

Figure S5 Changes in averaged temperature at a height of 2 m, specific humidity at a height of 2 m, potential velocity at a height of  $\sim 300$  hPa (PVU: potential vorticity unit;  $1 \text{ PVU} = 10^{-6} \text{ km}^2 \text{ kg}^{-1} \text{ s}^{-1}$ ), planetary boundary layer height, total clouds fraction, and accumulated precipitation in the daytime in summer from 2014 to 2017 relative 2013.

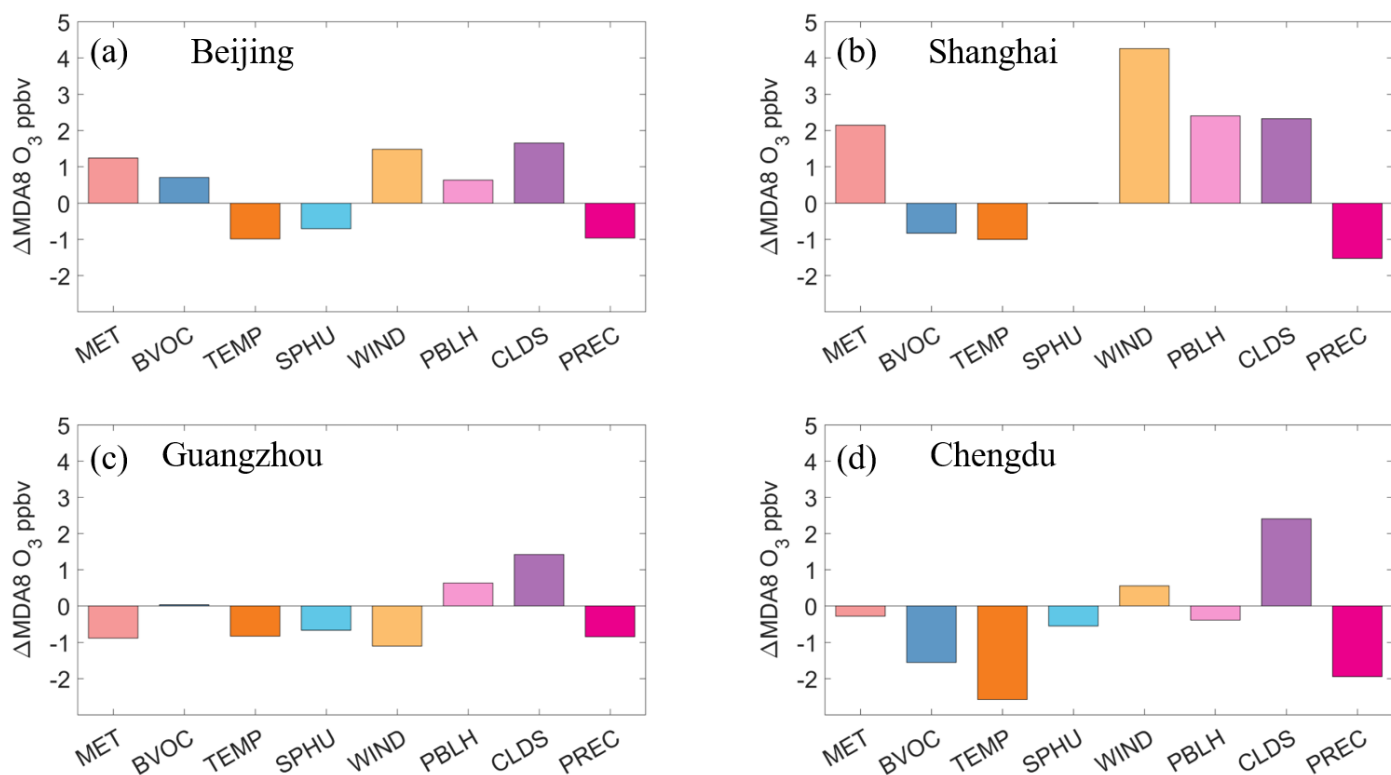

Figure S6 Changes in the simulated summer surface MDA8 O<sub>3</sub> concentrations in (a) Beijing, (b) Shanghai, (c) Guangzhou, and (d) Chengdu due to variations in various meteorological factors in 2017 relative to 2013, including meteorology (MET), temperature-dependent biogenic emissions (BVOC), temperature via changes in reaction rates (TEMP), specific humidity (SPHU), wind fields (WIND), planetary boundary layer height (PBLH), clouds (CLDS), and precipitation (PREC).

Table S1. Settings of physical parameterization schemes for the WRF model

| Item                       | Option                                     |
|----------------------------|--------------------------------------------|
| Microphysics scheme        | Lin et al. scheme                          |
| Longwave radiation scheme  | rrtm scheme                                |
| Shortwave radiation scheme | Goddard short wave                         |
| Surface-layer scheme       | Revised MM5 Monin-Obukhov scheme           |
| Land-surface scheme        | Unified Noah land-surface model            |
| Boundary-layer scheme      | YSU scheme                                 |
| Cumulus scheme             | Kain-Fritsch (new Eta) scheme              |
| Nudging options            | Grid four-dimensional data analysis (FDDA) |

Table S2. Heterogeneous reactions included in the CMAQ model and their uptake coefficients.

| No.                | Heterogeneous reactions                                                                                            | Uptake coefficient ( $\gamma$ ) or reaction rate ( $k$ )                                                                                                                                                                                                                                                                                     | References                  |
|--------------------|--------------------------------------------------------------------------------------------------------------------|----------------------------------------------------------------------------------------------------------------------------------------------------------------------------------------------------------------------------------------------------------------------------------------------------------------------------------------------|-----------------------------|
| Original CMAQ      |                                                                                                                    |                                                                                                                                                                                                                                                                                                                                              |                             |
| OR1                | $N_2O_5(g) + H_2O(cd) + \varphi^a Cl^-(cd) \rightarrow \varphi^a(HNO_3(g) + ClNO_2(g)) + 2(1 - \varphi^a)HNO_3(g)$ | $\gamma_{N_2O_5} = 3.2 \times 10^{-8} k' \left( 1 - \frac{1}{\left( \frac{0.06[H_2O(l)]}{[NO_3^-]} \right) + 1 + \left( \frac{2\varphi[Cl^-]}{[NO_3^-]} \right)} \right)^b$<br>$k' = 1.15 \times 10^6 - 1.15 \times 10^6 e^{[-0.13 \times [H_2O(l)]]}$                                                                                       | Bertram and Thornton (2009) |
| OR2                | $NO_2(g) \rightarrow 0.5HONO(g) + 0.5HNO_3(g)$                                                                     | $k_{NO_2} = 5 \times 10^{-5} \times (S/V)$<br>$S/V = \text{surface to volume ratio}$                                                                                                                                                                                                                                                         | Kurtenbach et al. (2001)    |
| OR3                | $NO_3(g) \rightarrow HNO_3(g)$                                                                                     | $1.0 \times 10^{-4}$                                                                                                                                                                                                                                                                                                                         | Mao et al. (2013)           |
| Newly updated CMAQ |                                                                                                                    |                                                                                                                                                                                                                                                                                                                                              |                             |
| NR1                | $N_2O_5(g) + H_2O(cd) + \varphi^a Cl^-(cd) \rightarrow \varphi^a(HNO_3(g) + ClNO_2(g)) + 2(1 - \varphi^a)HNO_3(g)$ | $\gamma_{N_2O_5} = 3.2 \times 10^{-8} k \left( 1 - \frac{1}{\left( \frac{0.06[H_2O(l)]}{[NO_3^-]} \right) + 1 + \left( \frac{2\varphi[Cl^-]}{[NO_3^-]} \right)} \right)^b$<br>$k = 1.15 \times 10^6 - 1.15 \times 10^6 e^{[-0.13 \times [H_2O(l)]]}$                                                                                         | Bertram and Thornton (2009) |
| NR2                | $NO_2(g) \rightarrow 0.5HONO(g) + 0.5HNO_3(g)$                                                                     | $k_{NO_2} = 5 \times 10^{-5} \times f_{RH} \times (S/V)$<br>$f_{RH} = \begin{cases} RH/50 & (RH < 50) \\ RH/10 - 4 & (50 \leq RH < 80) \\ 4 & (RH \geq 80) \end{cases}$<br>$k_{NO_2} = 1 \times 10^{-3} \times \frac{\text{Light intensity}}{400} \times (S/V)$<br>$RH = \text{relative humidity}$<br>$S/V = \text{surface to volume ratio}$ | Fu et al. (2019)            |
| NR3                | $NO_3(g) \rightarrow HNO_3(g)$                                                                                     | $1.0 \times 10^{-3}$                                                                                                                                                                                                                                                                                                                         | Jacob (2000)                |
| NR4                | $HO_2(g) \rightarrow 0.5H_2O_2(g)$                                                                                 | $2.0 \times 10^{-1}$                                                                                                                                                                                                                                                                                                                         | Jacob (2000)                |
| NR5                | $OH(g) \rightarrow \text{Products}$                                                                                | $1.0 \times 10^{-1}$                                                                                                                                                                                                                                                                                                                         | DeMore et al. (1997)        |
| NR6                | $O_3(g) \rightarrow \text{Products}$                                                                               | $1.0 \times 10^{-5}$                                                                                                                                                                                                                                                                                                                         | Bauer et al. (2004)         |
| NR7                | $H_2O_2(g) \rightarrow \text{Products}$                                                                            | $2.0 \times 10^{-3}$                                                                                                                                                                                                                                                                                                                         | de Reus et al. (2005)       |

<sup>a</sup> The yield of  $ClNO_2$ .

<sup>b</sup>  $[H_2O(l)]$ ,  $[NO_3^-]$ ,  $[Cl^-]$  are the concentrations of particle liquid water, particulate nitrate, and particulate chloride, respectively.



Table S3. Settings of sensitivity experiments for investigating the effects of changes in meteorological conditions and anthropogenic emissions on ozone variations.

| Experiment  | Description                                                                                                        |
|-------------|--------------------------------------------------------------------------------------------------------------------|
| M13E13      | Modeling the summer of 2013 with MEIC 2013 anthropogenic emission                                                  |
| M14E14      | Modeling the summer of 2014 with MEIC 2014 anthropogenic emission                                                  |
| M15E15      | Modeling the summer of 2015 with MEIC 2015 anthropogenic emission                                                  |
| M16E16      | Modeling the summer of 2016 with MEIC 2016 anthropogenic emission                                                  |
| M17E17      | Modeling the summer of 2017 with MEIC 2017 anthropogenic emission                                                  |
| M14E13_BC13 | Modeling the summer of 2014 with MEIC 2013 anthropogenic emission and 2013 chemical boundary condition from MOZART |
| M15E13_BC13 | Modeling the summer of 2015 with MEIC 2013 anthropogenic emission and 2013 chemical boundary condition from MOZART |
| M16E13_BC13 | Modeling the summer of 2016 with MEIC 2013 anthropogenic emission and 2013 chemical boundary condition from MOZART |
| M17E13_BC13 | Modeling the summer of 2017 with MEIC 2013 anthropogenic emission and 2013 chemical boundary condition from MOZART |
| M13E14      | Modeling the summer of 2013 with MEIC 2014 anthropogenic emission                                                  |
| M13E15      | Modeling the summer of 2013 with MEIC 2015 anthropogenic emission                                                  |
| M13E16      | Modeling the summer of 2013 with MEIC 2016 anthropogenic emission                                                  |
| M13E17      | Modeling the summer of 2013 with MEIC 2017 anthropogenic emission                                                  |

Table S4. Settings of sensitivity experiments for investigating the impact of changes in biogenic emissions on ozone variations.

| Experiment   | Description                                                       |
|--------------|-------------------------------------------------------------------|
| M13E13       | Modeling the summer of 2013 with MEIC 2013 anthropogenic emission |
| M13E13_BIO14 | M13E13 but with 2014 biogenic emission                            |
| M13E13_BIO15 | M13E13 but with 2015 biogenic emission                            |
| M13E13_BIO16 | M13E13 but with 2016 biogenic emission                            |
| M13E13_BIO17 | M13E13 but with 2017 biogenic emission                            |

Table S5. Settings of sensitivity experiments for investigating the impact of changes of temperature, specific humidity, wind field, planetary boundary layer height, cloud, and precipitation on ozone variations.

---

| Experiment    | Description                                                       |
|---------------|-------------------------------------------------------------------|
| M13E13        | Modeling the summer of 2013 with MEIC 2013 anthropogenic emission |
| M13E13_TEMP17 | M13E13 but with 2017 temperature                                  |
| M13E13_SPHU17 | M13E13 but with 2017 specific humidity                            |
| M13E13_WIND17 | M13E13 but with 2017 wind field                                   |
| M13E13_PBLH17 | M13E13 but with 2017 planetary boundary layer height              |
| M13E13_CLDF17 | M13E13 but with 2017 cloud                                        |
| M13E13_PREC17 | M13E13 but with 2017 precipitation                                |

---

Table S6. Settings of sensitivity experiments for investigating the impact of changes in long-range transport on ozone variations.

| Experiment  | Description                                                       |
|-------------|-------------------------------------------------------------------|
| M13E13      | Modeling the summer of 2013 with MEIC 2013 anthropogenic emission |
| M13E13_BC14 | M13E13 but with 2014 chemical boundary condition                  |
| M13E13_BC15 | M13E13 but with 2015 chemical boundary condition                  |
| M13E13_BC16 | M13E13 but with 2016 chemical boundary condition                  |
| M13E13_BC17 | M13E13 but with 2017 chemical boundary condition                  |

#### References:

- Bauer, S. E., Balkanski, Y., Schulz, M., Hauglustaine, D. A., and Dentener, F.: Global modeling of heterogeneous chemistry on mineral aerosol surfaces: Influence on tropospheric ozone chemistry and comparison to observations, *J Geophys Res - Atmos*, 109, Artn D02304, 10.1029/2003jd003868, 2004.
- Bertram, T. H., and Thornton, J. A.: Toward a general parameterization of N<sub>2</sub>O<sub>5</sub> reactivity on aqueous particles: the competing effects of particle liquid water, nitrate and chloride, *Atmos Chem Phys*, 9, 8351-8363, 2009.
- de Reus, M., Fischer, H., Sander, R., Gros, V., Kormann, R., Salisbury, G., Van Dingenen, R., Williams, J., Zöllner, M., and Lelieveld, J.: Observations and model calculations of trace gas scavenging in a dense Saharan dust plume during MINATROC, *Atmos. Chem. Phys.*, 5, 1787-1803, 10.5194/acp-5-1787-2005, 2005.
- DeMore, W. B., Sander, S. P., Golden, D. M., Hampson, R. F., Kurylo, M. J., Howard, C. J., Ravishankara, A. R., Kolb, C. E., and Molina, M. J.: Chemical kinetics and photochemical data for use in stratospheric modeling, National Aeronautics and Space Administration and Jet Propulsion Laboratory, California Institute of Technology, California, 1997.
- Fu, X., Wang, T., Zhang, L., Li, Q., Wang, Z., Xia, M., Yun, H., Wang, W., Yu, C., Yue, D., Zhou, Y., Zheng, J., and Han, R.: The significant contribution of HONO to secondary pollutants during a severe winter pollution event in southern China, *Atmos. Chem. Phys.*, 19, 1-14, 10.5194/acp-19-1-2019, 2019.
- He, J., Gong, S., Yu, Y., Yu, L., Wu, L., Mao, H., Song, C., Zhao, S., Liu, H., Li, X., and Li, R.: Air pollution characteristics and their relation to meteorological conditions during 2014–2015 in major Chinese cities, *Environ. Pollut.*, 223, 484-496, <https://doi.org/10.1016/j.envpol.2017.01.050>, 2017.
- Jacob, D. J.: Heterogeneous chemistry and tropospheric ozone, *Atmos. Environ.*, 34, 2131-2159, 2000.
- Kurtenbach, R., Becker, K. H., Gomes, J. A. G., Kleffmann, J., Lorzer, J. C., Spittler, M., Wiesen, P., Ackermann, R., Geyer, A., and Platt, U.: Investigations of emissions and heterogeneous formation of HONO in a road traffic tunnel, *Atmos. Environ.*, 35, 3385-3394, 10.1016/s1352-2310(01)00138-8, 2001.
- Mao, J. Q., Paulot, F., Jacob, D. J., Cohen, R. C., Crouse, J. D., Wennberg, P. O., Keller, C. A., Hudman, R. C., Barkley, M. P., and Horowitz, L. W.: Ozone and organic nitrates over the eastern United States: Sensitivity to isoprene chemistry, *J Geophys Res-Atmos*, 118, 11256-11268, 2013.
- Tu, J., Xia, Z. G., Wang, H. S., and Li, W. Q.: Temporal variations in surface ozone and its precursors and meteorological effects at an urban site in China, *Atmos Res*, 85, 310-337, 10.1016/j.atmosres.2007.02.003, 2007.
